# Supplementary material
Source: MDPI journal article supplement (https://www.mdpi.com/1424-2818/13/6/245)

## Supplementary Materials

**Table S1:** Locus name and sequences of the eight microsatellite loci used for assignment analysis of five positive controls and unknown captive individual of the Military Macaw.

| Locus               | Sequence (5'-3')     | Allelic size range (pb) | Genetic Diversity |       |
|---------------------|----------------------|-------------------------|-------------------|-------|
|                     |                      |                         | N <sub>T</sub>    | A     |
| UnaCT21             | CTTTCCCACTTAGCCATA   | 153-277                 | 29                | 6.71* |
| UnaCT32             | TCTTGCTTATTCTTCCCCAG | 248-268                 | 27                | 6.71* |
| UnaCT43             | TCATCCTATCACCAGAAAGG | 184-216                 | 14                | 5.14* |
| UnaCT74             | CTGGACTGCTGCTCTTAAA  | 138-190                 | 15                | 4.71* |
| UnaGT55             | TCTGCCCTCTGTCTTATGCC | 181-257                 | 13                | 3.14* |
| AgGT17 <sup>o</sup> | CCTGGATGTGCTCTGTGAG  | 134-242                 | 21                | 6.28* |
| AgGT19 <sup>+</sup> | CCTGCCTCCCAAAGAAGT   | 167-189                 | 12                | 3.14* |
| AgGT32 <sup>+</sup> | ACCCAGCTTCAGGTTTGTA  | 78-120                  | 20                | 6.71* |

Caparroz et al. 2003, <sup>o</sup>Russello et al. 2001, <sup>+</sup>Russello et al. 2005; \*HWD, Bonferroni correction  $P < 0.0001$

N<sub>T</sub> = total number of alleles identified by each locus, A = average number of alleles per locus

**Table S2:** Descriptive statistics over all loci for each reference populations, controls positive, and unknown individual of Military Macaw.

| Candidate locations                 | N  | N <sub>T</sub> | AR   | PAR | H <sub>E</sub> | H <sub>O</sub> | HW      | F <sub>IS</sub>   |
|-------------------------------------|----|----------------|------|-----|----------------|----------------|---------|-------------------|
| La Sierrita, Sonora                 | 5  | 27             | 18.1 | 4.7 | 0.60           | 0.51           | 0.4511  | 0.03              |
| Nuestra Señora del Mineral, Sinaloa | 23 | 91             | 18.7 | 6.4 | 0.72           | 0.59           | 0.0058* | 0.15 <sup>+</sup> |
| Mirador del Aguila, Nayarit         | 36 | 104            | 19.3 | 6.1 | 0.76           | 0.58           | 0.0157* | 0.11 <sup>+</sup> |
| El Tuito, Jalisco                   | 6  | 38             | 18.1 | 5.0 | 0.60           | 0.66           | 0.5652  | 0.06              |
| Santa Maria Tecomavaca, Oaxaca      | 6  | 39             | 18.0 | 4.9 | 0.61           | 0.61           | 0.6174  | 0.09              |
| Santa Maria de Cocos, Querétaro     | 5  | 27             | 17.6 | 8.5 | 0.54           | 0.48           | 0.4215* | 0.12 <sup>+</sup> |
| El Cielo, Tamaulipas                | 5  | 31             | 16.1 | 5.7 | 0.54           | 0.69           | 0.0121  | 0.08              |
| <b>Positive controls</b>            | 5  | 25             | 17.1 | 4.3 | 0.75           | 0.47           | 0.3509  | 0.05              |
| <b>Unknown individual</b>           | 1  | 9              | 4.5  | 2.1 | 0.46           | 0.65           | 0.4321  | 0.00              |

N = Sample size (individuals), N<sub>T</sub> = total number of alleles, AR = allelic richness, PAR = private allelic richness, H<sub>E</sub> = expected heterozygosity, H<sub>O</sub> = observed heterozygosity, HW = Tests for Hardy-Weinberg Equilibrium, and F<sub>IS</sub> = inbreeding index. \*Significance level  $P = 0.05$ . \*HWE, Bonferroni correction  $P < 0.0001$ .

**Figure S1:** Ln (DK) values plotted from 1 to 10 for the genetic group of the A) Sierra Madre Occidental / Sierra Madre del Sur and B) Sierra Madre Oriental.

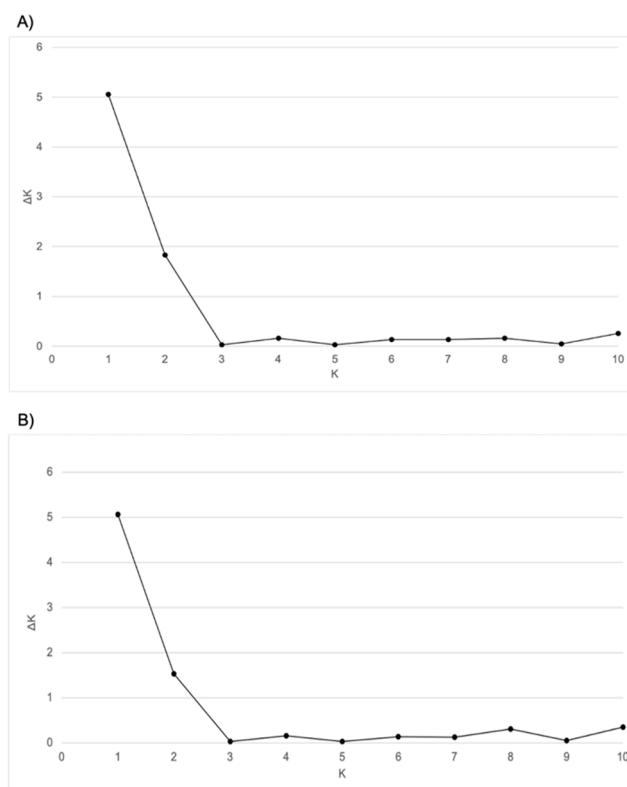

**Figure S2:** Changes in mean Bayesian Information Criterion (BIC) values in successive K-means clustering.

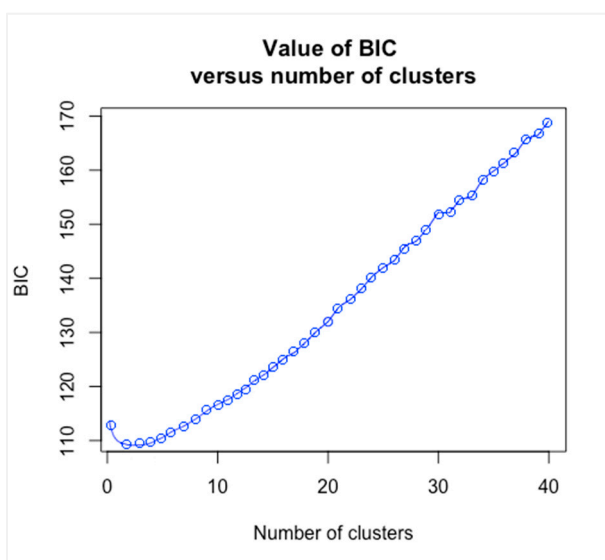

Supplement: s1 [file s1]
